# Supplementary material
Source: Springer Nature journal article supplement (https://www.springermedizin.de/resource/supplementary/13256_2011_1892_MOESM1_ESM.pdf/9648676)
Supplement: MOESM1 [file 9648676]

3rd RIT

4th RIT

5th RIT

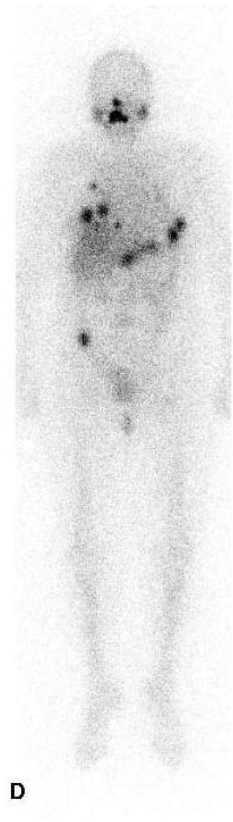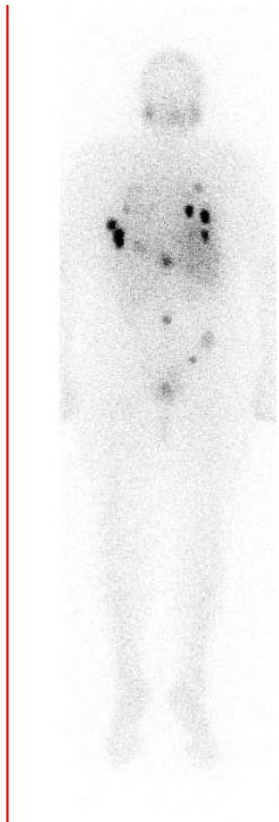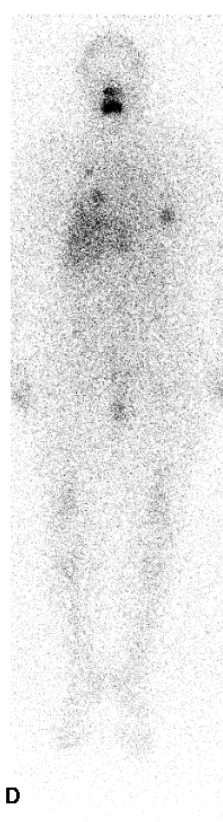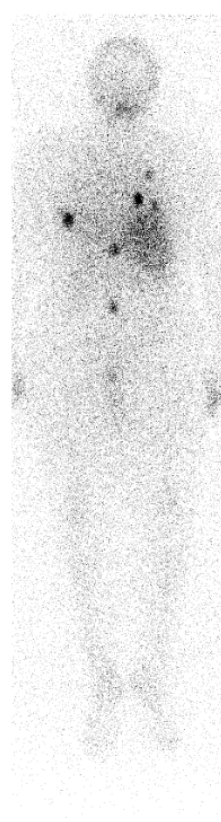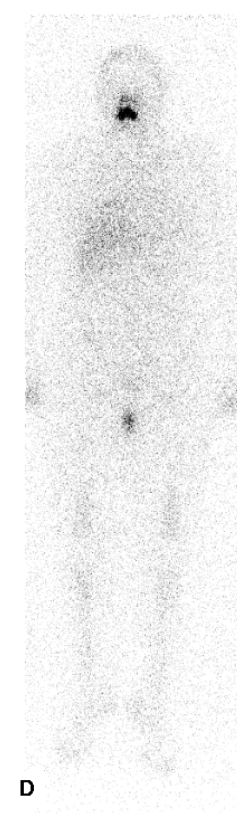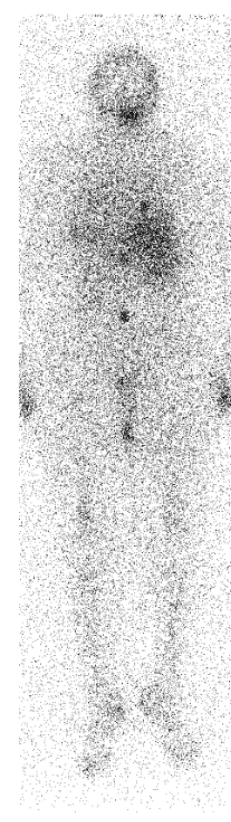

FACE ANTERIEURE

FACE POSTERIEURE

FACE ANTERIEURE

FACE POSTERIEURE

FACE ANTERIEURE

FACE POSTERIEURE
